# Supplementary material for: Activation of the PI3K/AKT pathway correlates with prognosis in stage II colon cancer
Source: PubMed Central journal article supplement — Br J Cancer. 2014 Mar 11;110(8):2081–9. doi: 10.1038/bjc.2014.100 (PMC3992486; doi:10.1038/bjc.2014.100), 2014-03-11
Supplement: bjc2014100x1.pdf [file bjc2014100x1.pdf]

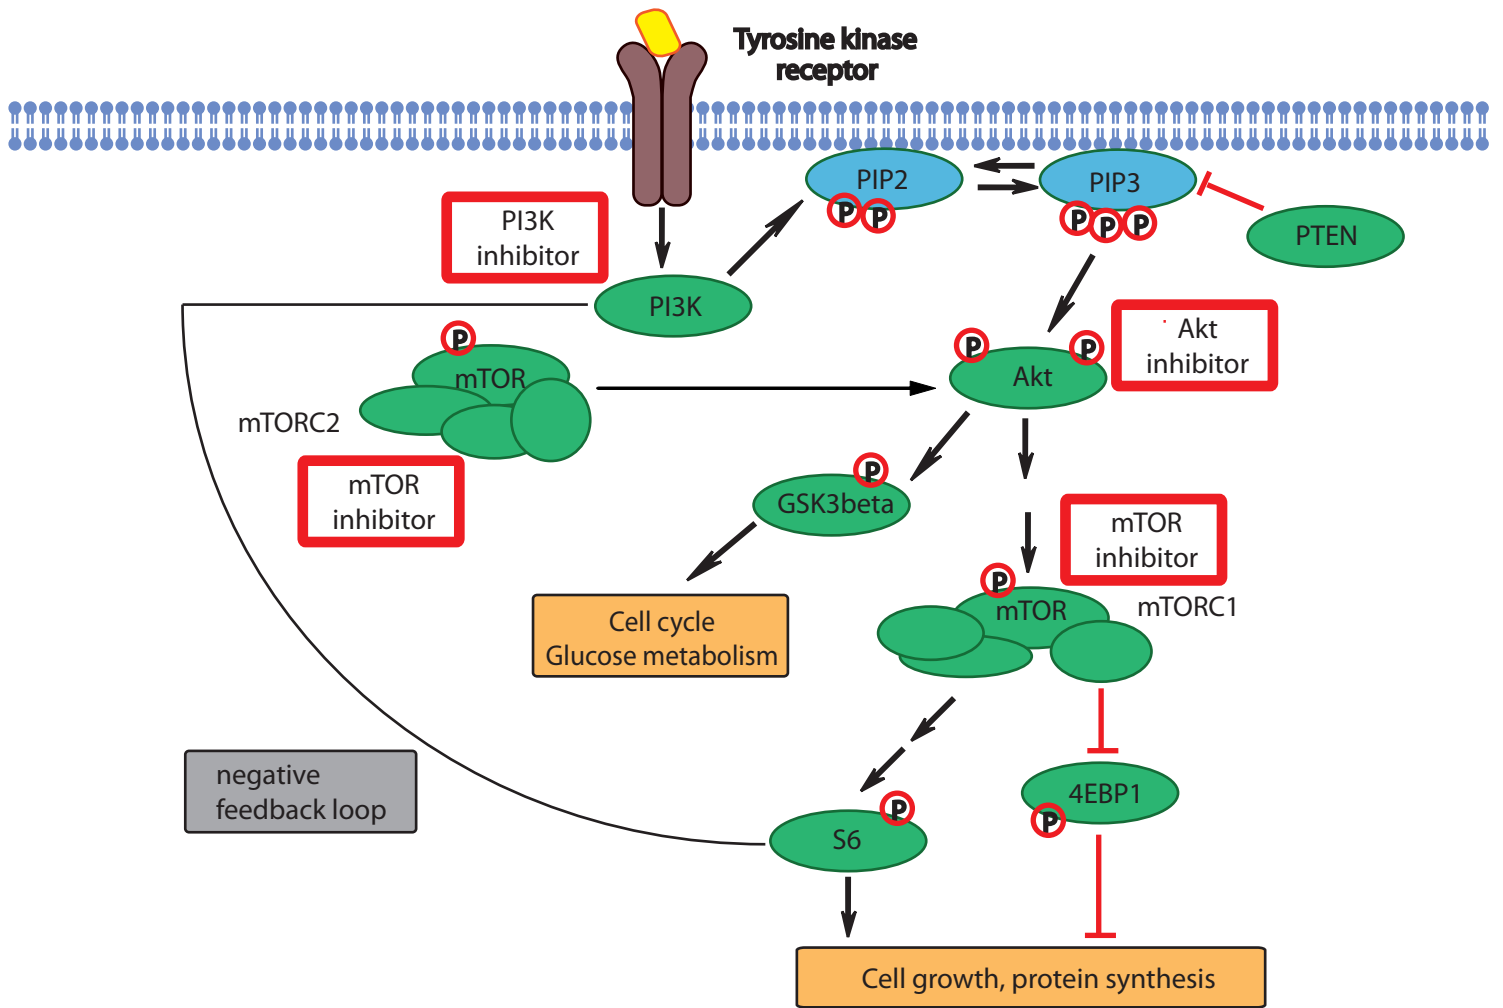

Supplementary Figure 1: PI3K/AKT pathway activation as source of potential prognostic markers and targets for personalised therapy. The PI3K/AKT pathway is often activated in human carcinomas and associated with enhanced metabolism and cell growth. Thus, activation of key factors might be associated with prognosis in stage II colon cancer patients. All proteins named in this scheme were analysed for their expression and phosphorylation. Additionally, possible target sites for known inhibitors of the pathway are depicted.
