# Supplementary material for: Activation of the PI3K/AKT pathway correlates with prognosis in stage II colon cancer
Source: PubMed Central journal article supplement — Br J Cancer. 2014 Mar 11;110(8):2081–9. doi: 10.1038/bjc.2014.100 (PMC3992486; doi:10.1038/bjc.2014.100), 2014-03-11
Supplement: bjc2014100x2.pdf [file bjc2014100x2.pdf]

**Supplementary Figure 2: Example of a stained RPPA and the dilution curves plus relative expression units for a low expressing and a high expressing sample, respectively.**

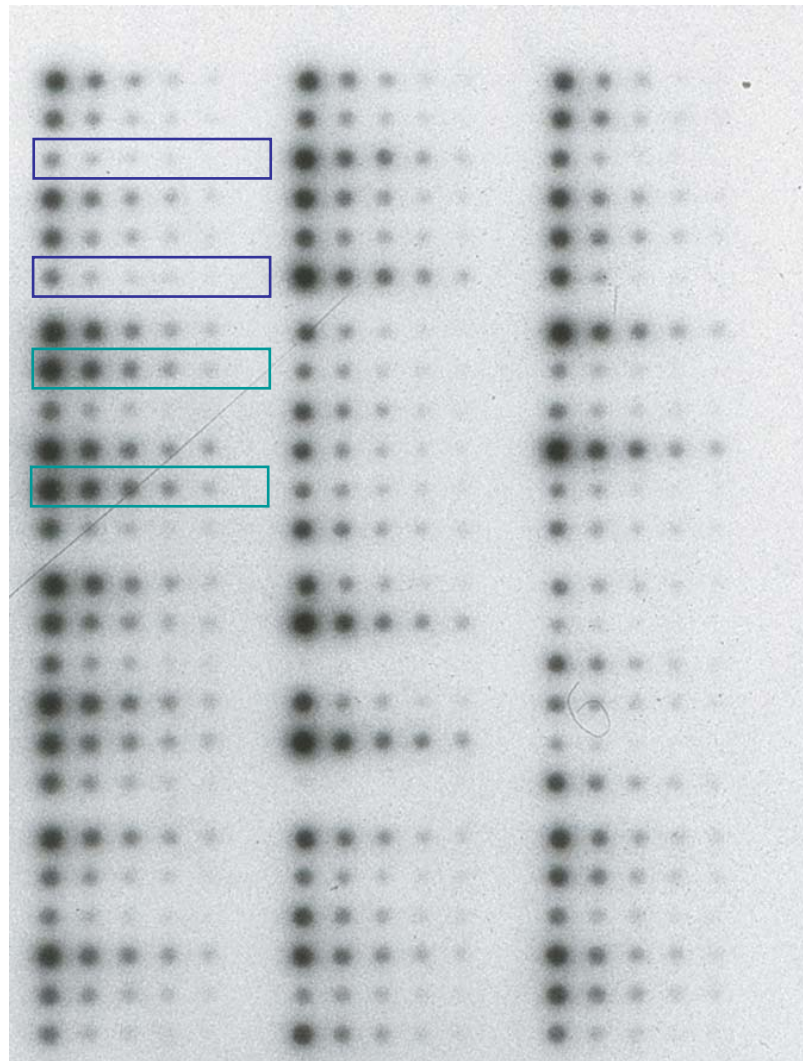

**Antibody stained RPPA slide (Akt)**  
 Blue: low expressing sample  
 Green: high expressing sample

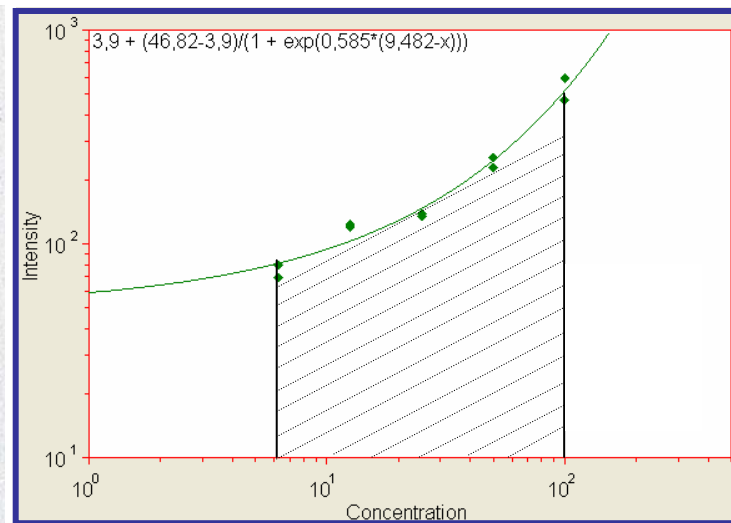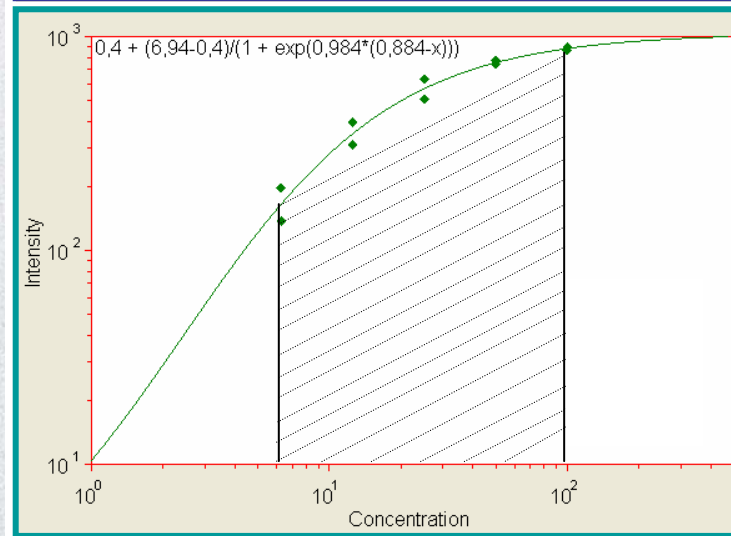

**Dilution curves generated by Microvigene**  
 Area under the curve as measure for relative intensities (RIU)  
 Blue: 164 RIU  
 Green: 498 RIU
