# Supplementary material for: Activation of the PI3K/AKT pathway correlates with prognosis in stage II colon cancer
Source: PubMed Central journal article supplement — Br J Cancer. 2014 Mar 11;110(8):2081–9. doi: 10.1038/bjc.2014.100 (PMC3992486; doi:10.1038/bjc.2014.100), 2014-03-11
Supplement: bjc2014100x3.pdf [file bjc2014100x3.pdf]

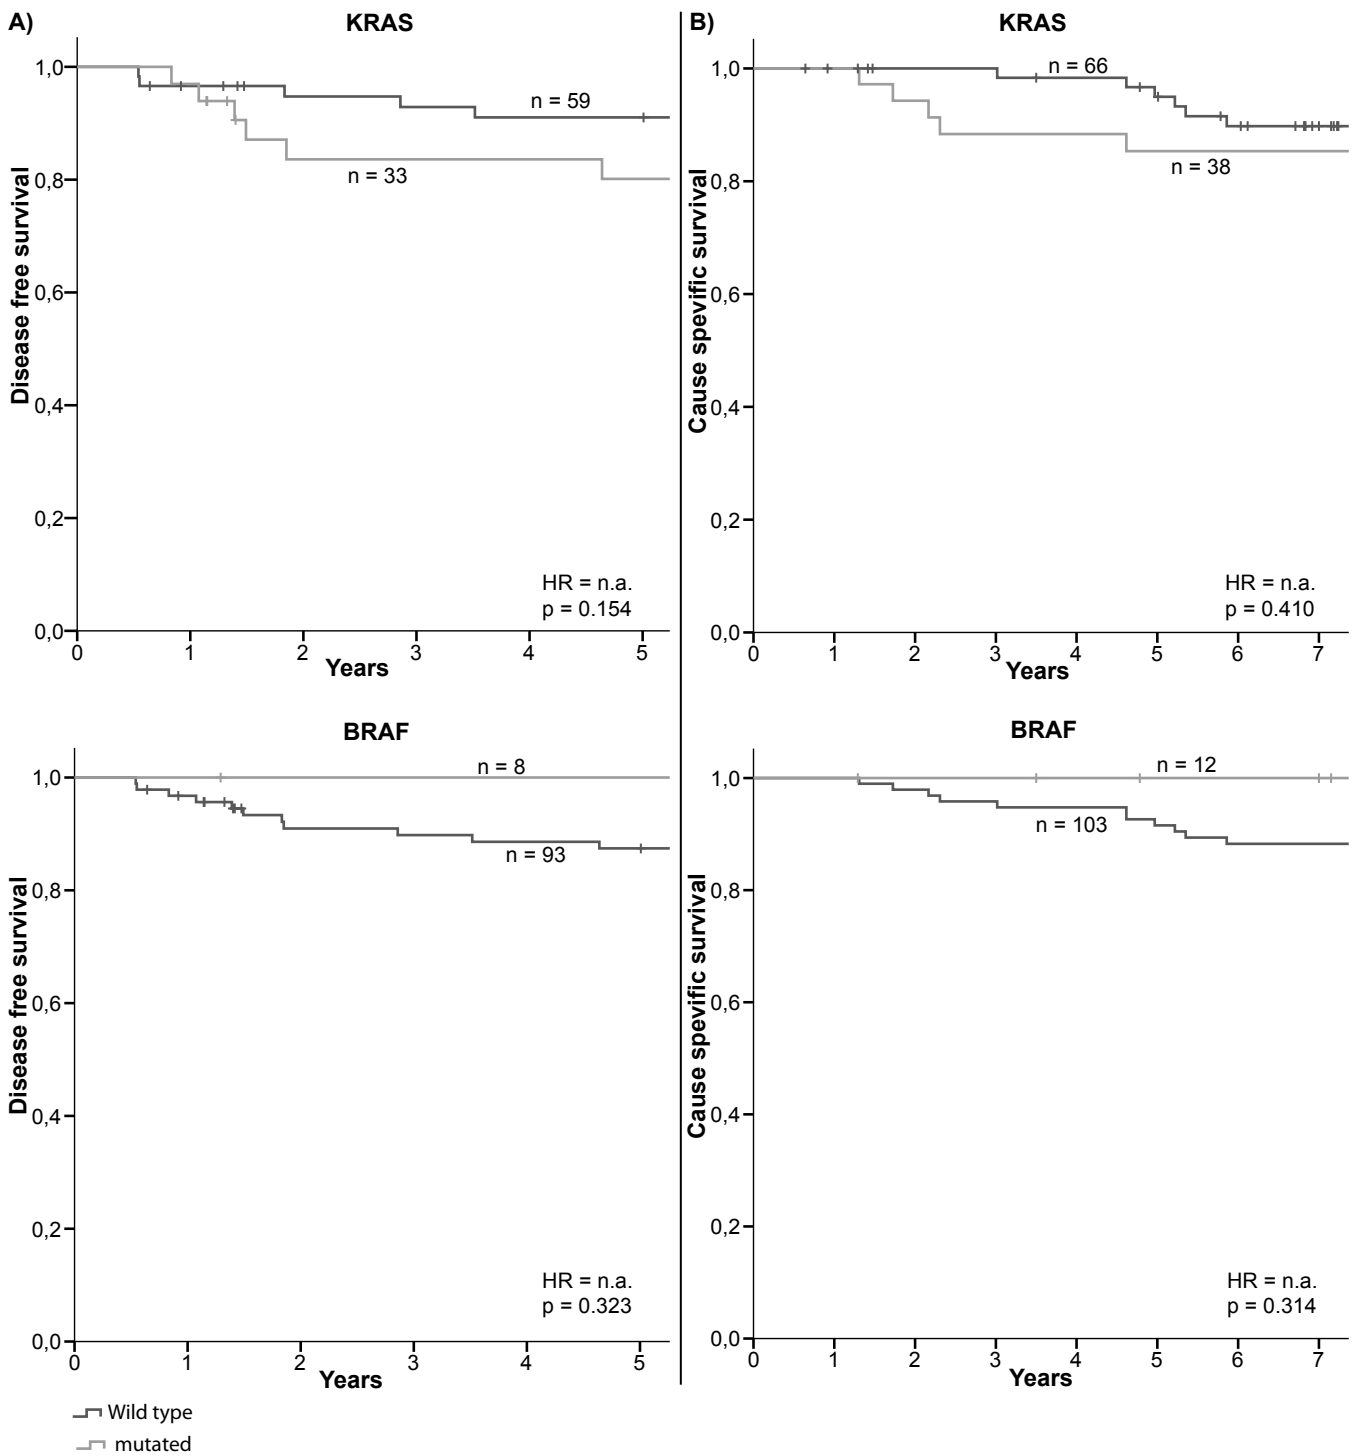

**Supplementary Figure 3: Korrelation of KRAS and BRAF mutation with survival.** A) Correlation of KRAS and BRAF mutation with disease free survival. 66 patients showed the mutation in KRAS, 38 were wild type for this gene. For 14 patients there was no conclusive data on this mutation. The V600E mutation of BRAF was present in 12 patients 103 were wild type for this locus. For 3 patients there was no conclusive data on this mutation. For 16 patients no data on disease free survival was available. Kaplan-Meier analysis showed no significant correlation of KRAS or BRAF mutation with the disease free interval ( $p = 0.154$  and  $0.323$ , respectively).

B) None of the mutations correlated significantly with cause specific survival ( $p = 0.410$  and  $0.314$ , respectively)
